# Supplementary material for: Exploring the Co-Crystallization of Kojic Acid with Silver(I), Copper(II), Zinc(II), and Gallium(III) for Potential Antibacterial Applications
Source: MDPI journal article supplement (doi:10.3390/molecules28031244), 2023-01-27
Supplement: s1 [file s1]

## Supporting Information

(5 pages)

### Exploring the co-crystallization of kojic acid with copper(II), silver (I), zinc(II) and gallium(III) for potential antibacterial applications.

Renren Sun,<sup>a,b</sup> Lucia Casali,<sup>a</sup> Raymond J. Turner,<sup>c,\*</sup> Dario Braga<sup>a</sup> and Fabrizia Grepioni<sup>a,\*</sup>

- a. Dipartimento di Chimica “Giacomo Ciamician”, Università di Bologna, Via Selmi 2, 40126 Bologna, Italy.
- b. School of Chemical Engineering, Zhengzhou University, 450001, Zhengzhou, Henan Province, The People’s Republic of China.
- c. Department of Biological Sciences, University of Calgary, Calgary, Alberta, Canada, T2N 1N4.

|                                                               |          |
|---------------------------------------------------------------|----------|
| <b>Structural characterization via X-ray diffraction.....</b> | <b>2</b> |
| <b>Powder X-ray diffraction patterns.....</b>                 | <b>3</b> |
| <b>TGA.....</b>                                               | <b>5</b> |

## Structural characterization via X-ray diffraction

**Table S1.** Crystal data and details of measurements for the compounds described in this work (HKA = kojic acid; KA = kojate anion).

| Compound                                                                     | Zn(KA) <sub>2</sub>                               | Cu(KA) <sub>2</sub> <sup>a</sup>                 | [Ag(HKA)(NO <sub>3</sub> )]·H <sub>2</sub> O                      | [Ga(KA) <sub>2</sub> (OH <sub>2</sub> ) <sub>2</sub> ][NO <sub>3</sub> ]·H <sub>2</sub> O |
|------------------------------------------------------------------------------|---------------------------------------------------|--------------------------------------------------|-------------------------------------------------------------------|-------------------------------------------------------------------------------------------|
| Chemical formula                                                             | C <sub>12</sub> H <sub>10</sub> O <sub>8</sub> Zn | C <sub>12</sub> H <sub>10</sub> CuO <sub>8</sub> | C <sub>6</sub> H <sub>8</sub> AgNO <sub>7</sub> ·H <sub>2</sub> O | C <sub>12</sub> H <sub>15</sub> GaNO <sub>14</sub>                                        |
| Formula weight                                                               | 347.57                                            | 345.00                                           | 330.00                                                            | 466.97                                                                                    |
| Temperature (K)                                                              | 298                                               | 298                                              | 223                                                               | 298                                                                                       |
| Crystal system                                                               | Triclinic                                         | Monoclinic                                       | Orthorhombic                                                      | Monoclinic                                                                                |
| Space group                                                                  | <i>P</i> -1                                       | <i>P</i> 2 <sub>1</sub> / <i>a</i>               | <i>P</i> n2 <sub>1</sub> / <i>a</i>                               | <i>P</i> 2 <sub>1</sub> / <i>c</i>                                                        |
| <i>a</i> (Å)                                                                 | 5.1557(5)                                         | 15.313(2)                                        | 14.4029(5)                                                        | 11.4594(11)                                                                               |
| <i>b</i> (Å)                                                                 | 7.7602(7)                                         | 6.805(2)                                         | 3.6487(2)                                                         | 21.4272(16)                                                                               |
| <i>c</i> (Å)                                                                 | 7.8702(7)                                         | 11.923(2)                                        | 17.9803(7)                                                        | 7.0775(15)                                                                                |
| $\alpha$ (°)                                                                 | 94.492(7)                                         | 90                                               | 90                                                                | 90                                                                                        |
| $\beta$ (°)                                                                  | 108.982(8)                                        | 110.158(3)                                       | 90                                                                | 90.157(13)                                                                                |
| $\gamma$ (°)                                                                 | 97.130(7)                                         | 90                                               | 90                                                                | 90                                                                                        |
| <i>V</i> (Å <sup>3</sup> )                                                   | 293.08(5)                                         | 1171(3)                                          | 944.90(7)                                                         | 1737.8(4)                                                                                 |
| <i>Z</i>                                                                     | 1                                                 | 4                                                | 4                                                                 | 4                                                                                         |
| <i>F</i> (000)                                                               | 176.0                                             | 700.0                                            | 645.0                                                             | 948.0                                                                                     |
| $\rho_{\text{calc}}$ (g·cm <sup>-3</sup> )                                   | 1.969                                             | 1.961                                            | 2.320                                                             | 1.785                                                                                     |
| <i>M</i> $\mu$ (mm <sup>-1</sup> )                                           | 2.137                                             | 3.070                                            | 2.164                                                             | 1.662                                                                                     |
| <i>R</i> <sub>wp</sub>                                                       | ---                                               | 0.0417                                           | ---                                                               | ---                                                                                       |
| <i>N</i> <sub>refl</sub> , <i>N</i> <sub>par</sub>                           | 1339, 98                                          | ---                                              | 1634, 153                                                         | 3187, 266                                                                                 |
| <i>R</i> 1 [ <i>F</i> <sub>o</sub> <sup>2</sup> , <i>I</i> > 2σ( <i>I</i> )] | 0.0375                                            | ---                                              | 0.0362                                                            | 0.0847                                                                                    |
| <i>wR</i> 2 (all data)                                                       | 0.0770                                            | ---                                              | 0.0591                                                            | 0.2038                                                                                    |

<sup>a</sup> Structural solution from powder data.

## Powder X-ray diffraction

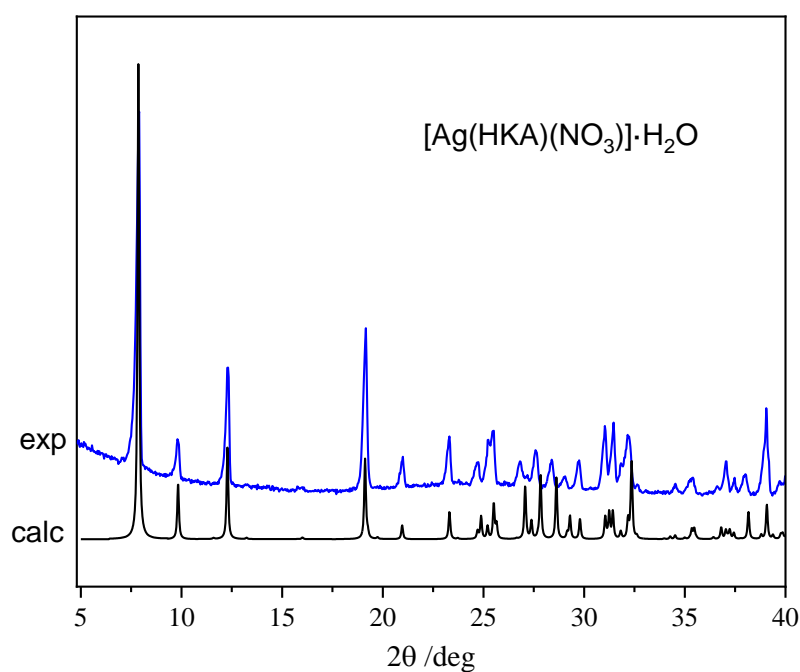

**Figure S1:** Comparison between the experimental pattern for the ball milling product of the reaction between HKA and  $\text{AgNO}_3$  (blue line) and the pattern calculated from single crystal data for  $[\text{Ag}(\text{HKA})(\text{NO}_3)] \cdot \text{H}_2\text{O}$  (black line). Small differences in the peaks positions are due to the difference in the powder data collection temperature (RT) with respect to single crystal (223 K).

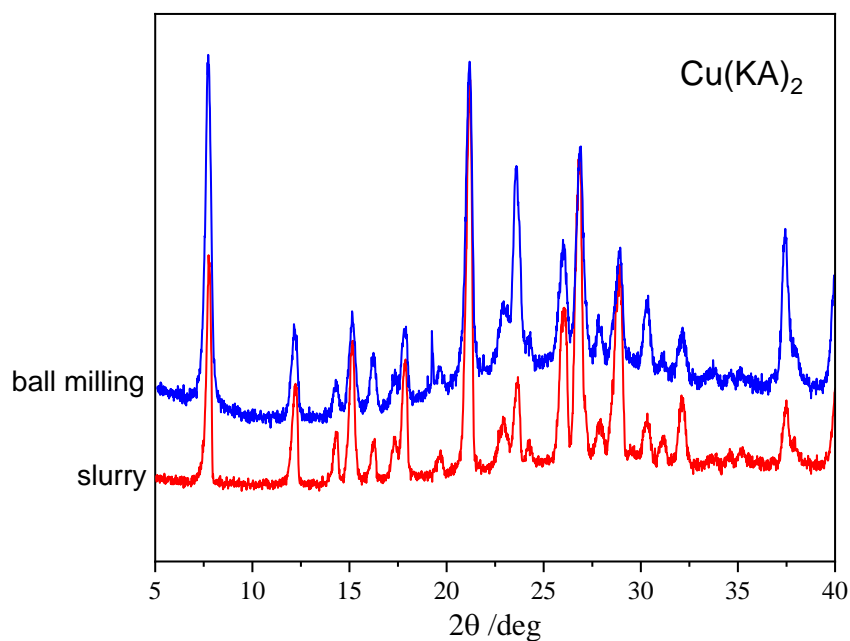

**Figure S2:** Comparison between XRD patterns for the slurry (red line) and ball milling (blue line) products of the reaction between HKA and  $\text{Cu}(\text{NO}_3)_2$ .

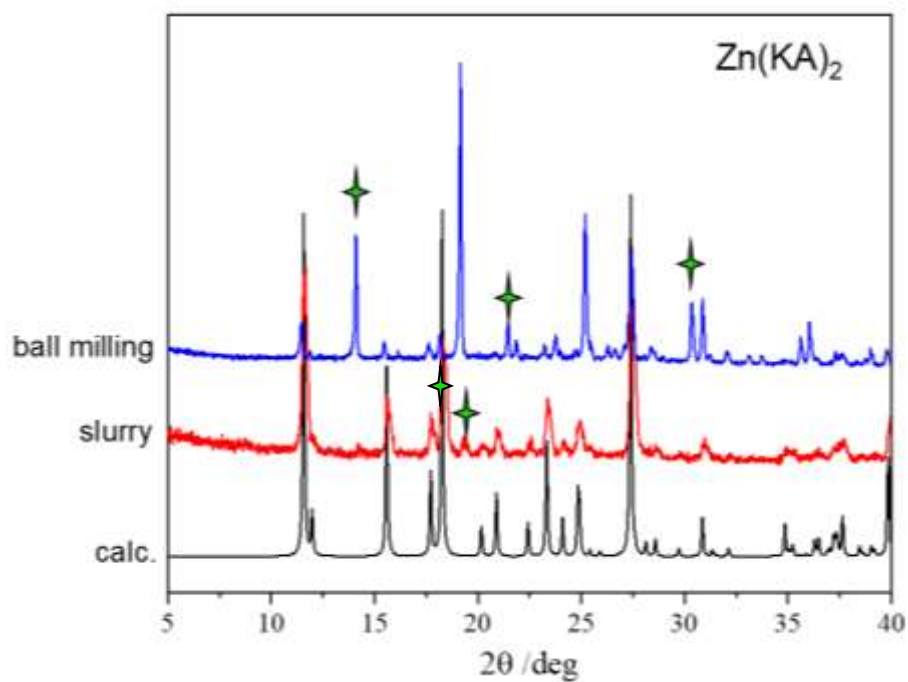

**Figure S3:** Comparison between the experimental patterns of ball milling (blue line) and slurry (red line) products of the reaction between HKA and  $\text{Zn}(\text{NO}_3)_2$ , and the pattern calculated from  $\text{Zn}(\text{KA})_2$  single crystal data (black line). Green stars indicate the presence of unreacted HKA (almost absent in the slurry product).

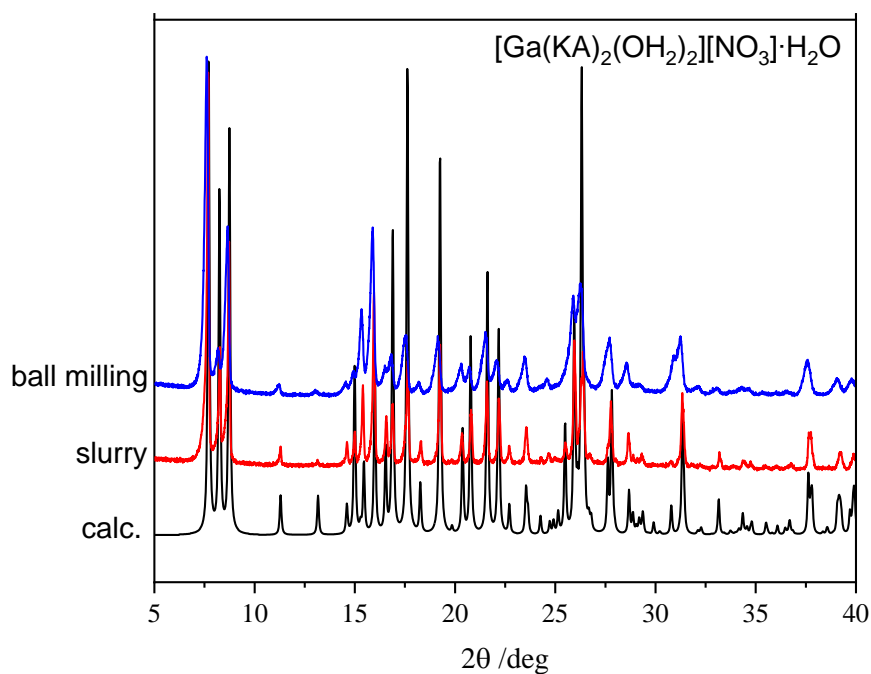

**Figure S4:** Comparison between the experimental patterns for the ball milling (blue line) and slurry (red line) products of the reaction between HKA and  $\text{Ga}(\text{NO}_3)_3$ , and the pattern calculated from single crystal data for  $[\text{Ga}(\text{KA})_2(\text{OH}_2)_2][\text{NO}_3] \cdot \text{H}_2\text{O}$  (black line).

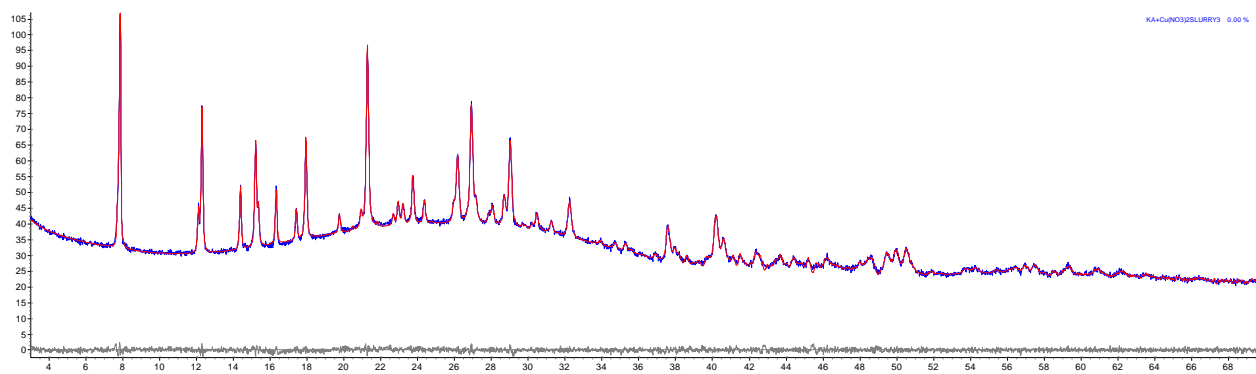

**Figure S5:** Pawley refinement plots for  $\text{Cu(KA)}_2$ .

### Thermogravimetric analysis (TGA)

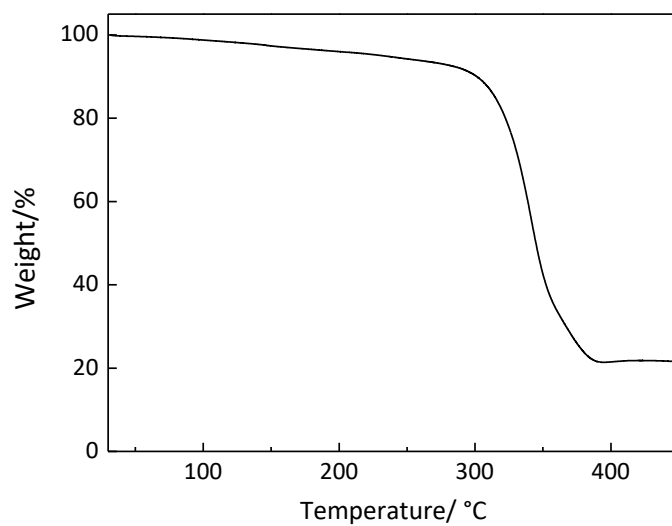

**Figure S6:** TGA trace for the product of the slurry reaction between HKA and  $\text{Cu(NO}_3)_2$ .
